# Supplementary material
Source: PubMed Central journal article supplement (PMC7645969)
Supplement: NIHMS1599579-supplement-SI.pdf [file NIHMS1599579-supplement-SI.pdf]

## Pharmacological manipulation of cGMP and NO/cGMP in CNS drug discovery

Michael A. Hollas,<sup>a</sup> Manel Ben Aissa,<sup>a</sup> Sue H. Lee,<sup>a</sup> Jesse M. Gordon-Blake,<sup>a</sup> and Gregory R.J. Thatcher,<sup>a\*</sup>

<sup>a</sup>*Department of Medicinal Chemistry and Pharmacognosy, College of Pharmacy, University of Illinois at Chicago, Chicago, USA*

---

**Abstract** The development of small molecule modulators of NO/cGMP signaling for use in the CNS has lagged far behind the use of such clinical agents in the periphery, despite the central role played by NO/cGMP in learning and memory, and the substantial evidence that this signaling pathway is perturbed in neurodegenerative disorders, including Alzheimer's disease. The NO-chimeras, NMZ and Nitrosynapsin, have yielded beneficial and disease-modifying responses in multiple preclinical animal models, acting on GABA<sub>A</sub> and NMDA receptors, respectively, providing additional mechanisms of action relevant to synaptic and neuronal dysfunction. Several inhibitors of cGMP-specific phosphodiesterases (PDE) have replicated some of the actions of these NO-chimeras in the CNS. There is no evidence that nitrate tolerance is a phenomenon relevant to the CNS actions of NO-chimeras, and studies on nitroglycerin in the periphery continue to challenge the dogma of nitrate tolerance mechanisms. Hybrid nitrates have shown much promise in the periphery and CNS, but ~~de~~to date only one treatment has received FDA approval, for glaucoma. The potential for allosteric modulation of soluble guanylate cyclase (sGC) in brain disorders has not yet been fully explored nor exploited; whereas multiple applications of PDE inhibitors have been explored and many have stalled in clinical trials.

Neurodegeneration; cGMP; nitric oxide; NMDA receptor; GABA receptor; migraine; Alzheimer's disease

---

\* Corresponding author. Tel.: +1-312-355-5282; e-mail: thatcher@uic.edu.

## Nitric Oxide

|                        | Drug          | Pharmaceutical Mechanism | Disease Target | Observed Effect                                                                                                                    | Model                                   | Clinical                  | Refs            |
|------------------------|---------------|--------------------------|----------------|------------------------------------------------------------------------------------------------------------------------------------|-----------------------------------------|---------------------------|-----------------|
| <b>NO-Donors</b>       | Nitrosynapsin | NO-Hybrid drug           | AD/Autism      | ↓ Aβ-induced synapse damage                                                                                                        | 3xTg                                    | -                         | [106]           |
|                        | NMZ (GT-1061) | NO-Hybrid drug           | AD             | LTP restoration in hippocampal slices, ↑ memory, and ↓ Aβ                                                                          | APP/PS1, 3xTg, and 5xFAD/hAPO E4        | -                         | [97, 104]       |
|                        | NCX-116       | NO-NSAID                 | AD             | -                                                                                                                                  |                                         | FDA approved for Glaucoma |                 |
|                        | HCT-1026      | NO-NSAID                 | AD             | Reversed cognitive deficits induced by scopolamine, ↓ the Aβ <sub>1-42</sub> -induced glia reaction, iNOS ↑ and p38MAPK activation | APP/PS1                                 | -                         | [102, 151, 152] |
|                        | NCX-2216      | NO-NSAID                 | AD             | ↓ Aβ <sub>1-42</sub> -induced glia reaction, ↑ iNOS and ↑ p38MAPK                                                                  |                                         | -                         | [151]           |
|                        | CHF-5074      | NO-NSAID                 | AD             | Reversal of contextual memory deficit                                                                                              | Tg2576                                  | Phase II [176, 177]       | [171, 172, 173] |
|                        | 9a            | Furoxan                  | AD             | ↑ LTP in hippocampal slices treated with oligomeric Aβ                                                                             |                                         | -                         | [205]           |
|                        | Sin-1         | NO-Donor                 | AD             | ↓ 7-nitroindazole induced learning deficit, scopolamine-induced amnesia and hypermotility in rats                                  |                                         | -                         | [228-233]       |
| <b>HNO-Donors</b>      | Angeli's salt | HNO-Donor                | AD             | ↑ cerebral ischemia-reperfusion injury                                                                                             | Experimental stroke model - C57BL6/J    | -                         | [239, 242]      |
| <b>sGC Stimulators</b> | YC-1          | sGC Stimulator           | AD             | LTP restoration in hippocampal slices, attenuated scopolamine-induced amnesia                                                      | adult Wistar rats                       | -                         | [255, 256]      |
|                        | VL-102        | sGC Stimulator           | Migraine       | Acute and chronic mechanical cephalic and hind-paw allodynia                                                                       | C57BL/6                                 | -                         | [120]           |
| <b>sGC Inhibitors</b>  | ODQ           | sGC Inhibitor            | PD, Migraine   | Improved deficits in forelimb akinesia induced by 6-OHDA and MPTP. ↓ acute and chronic hyperalgesia induced by nitroglycerin       | 6-OHDA and MPTP treated rats            | -                         | [266]           |
| <b>NOS Inhibitors</b>  | L-NMMA        | NOS inhibitor            | Migraine       | -                                                                                                                                  |                                         | Phase II [127]            |                 |
| <b>PDE Inhibitors</b>  | Sildenafil    | PDE5 Inhibitor           | AD             | ↑ synaptic function, CREB phosphorylation, and memory. Reversed cognitive impairment of Tg2576 mice                                | APP/PS1, aging mouse model, J20, Tg2576 | -                         | [282, 283]      |
|                        | Tadalafil     | PDE5 Inhibitor           | AD             | ↑ performance of J20 mice in the Morris water maze test                                                                            | J20                                     | -                         | [284-286]       |

## Nitric Oxide

|               |                  |                         |                                                                                                                                                                                                                          |                 |          |                     |
|---------------|------------------|-------------------------|--------------------------------------------------------------------------------------------------------------------------------------------------------------------------------------------------------------------------|-----------------|----------|---------------------|
| UK-343664     | PDE5 Inhibitor   | AD                      | Ineffective at preventing MK-801-induced memory disruption, however, ↓ the memory impairment of scopolamine                                                                                                              | MK-801          | -        | [287]               |
| YF012403      | PDE5 Inhibitor   | AD                      | Rescued the defects in LTP, synaptic, plasticity and memory                                                                                                                                                              | APP/PS1         | -        | [288]<br>[289]      |
| CM-414        | PDE5 Inhibitor   | AD                      | LTP restoration in hippocampal slices. ↓ brain Aβ and tau phosphorylation, reversed a decrease in dendritic spine density on hippocampal neurons, and reversed cognitive deficits                                        | APP/PS1, Tg2576 | -        | [291]               |
| BAY 73-6691   | PDE9 Inhibitor   | AD                      | ↑ acquisition, consolidation, and retention of long-term memory (LTM) in a social recognition task ↓ a scopolamine-induced retention deficit in a passive avoidance task, and MK-801-induced short-term memory deficits. | FBNF1 rats      | -        | [295]               |
| PF-04447943   | PDE9 Inhibitor   | AD                      | LTP restoration in hippocampal slices, ↑ indicators of hippocampal synaptic plasticity and improved cognitive function                                                                                                   | Tg2576          | Phase II | [298]<br>[296, 297] |
| BI-409306     | PDE9 Inhibitor   | AD, Schizophrenia       | -                                                                                                                                                                                                                        | -               | Phase II | [299]               |
| SCH-51866     | PDE1/5 Inhibitor | HD                      | No effect in the R6/2 mouse model of HD                                                                                                                                                                                  | R6/2 HD         | -        | [301]               |
| BAY 60-7550   | PDE2 Inhibitor   | AD                      | ↑ performance of rats in social and object recognition memory tasks, and reversed MK801-induced deficits                                                                                                                 | MK-801          | -        | [23, 302-304]       |
| PF-05180999   | PDE2 Inhibitor   | Schizophrenia, Migraine | -                                                                                                                                                                                                                        | -               | Phase I  | [306]<br>[305]      |
| ND7001        | PDE2 Inhibitor   | Various CNS             | -                                                                                                                                                                                                                        | -               | -        | [307]               |
| Papaverine    | PDE10A Inhibitor | Psychosis               | ↓ conditioned avoidance responding in rats and mice and ↓ PCP induced hyperlocomotion                                                                                                                                    | Male CD rats    | -        | [308]<br>[309]      |
| PF-02545920   | PDE10A Inhibitor | HD                      | -                                                                                                                                                                                                                        | -               | Phase II | [310]               |
| TAK-063       | PDE10A Inhibitor | Schizophrenia           | ↓ PCP induced hyperlocomotion                                                                                                                                                                                            | C57BL/6         | -        | [311]               |
| “compound 96” | PDE10A Inhibitor | Psychosis               | Reversal of MK-801 induced hyperactivity and conditioned avoidance responding                                                                                                                                            | MK-801          | -        | [313]               |

**Table 1:** Pharmacological modulators of NO/cGMP signaling in the literature that have been utilized in disorders of the CNS, including their pharmacological targets and mode of action.

## Nitric Oxide

### NO-Donors

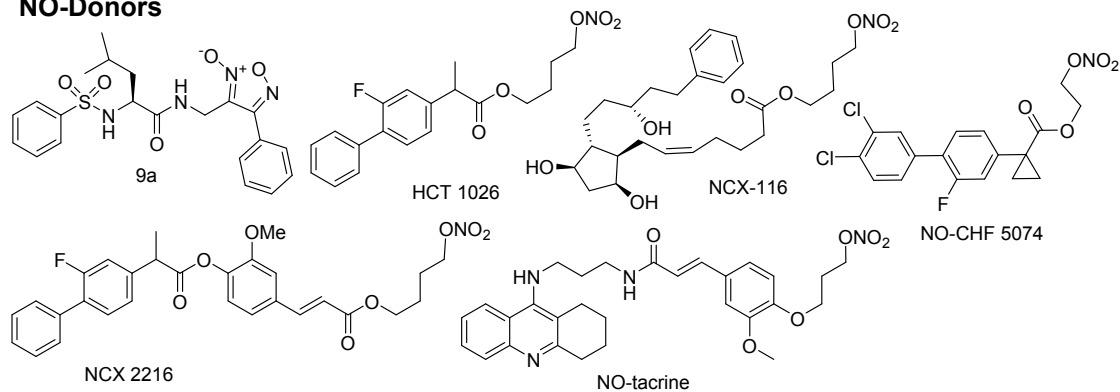

### sGC Stimulators

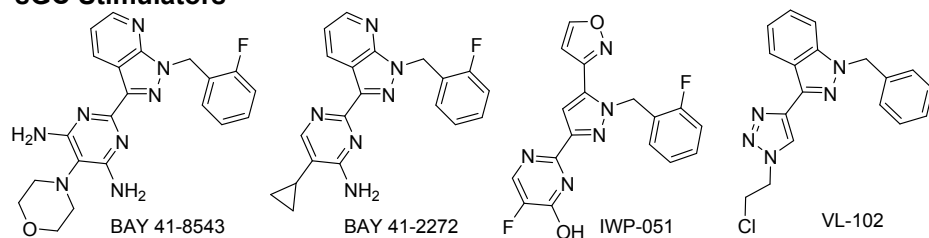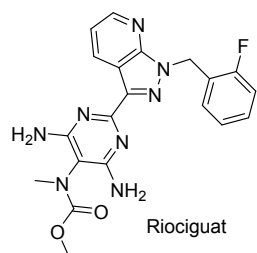

### sGC Inhibitors

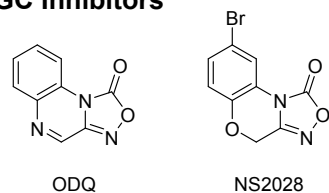

### PDE Inhibitors

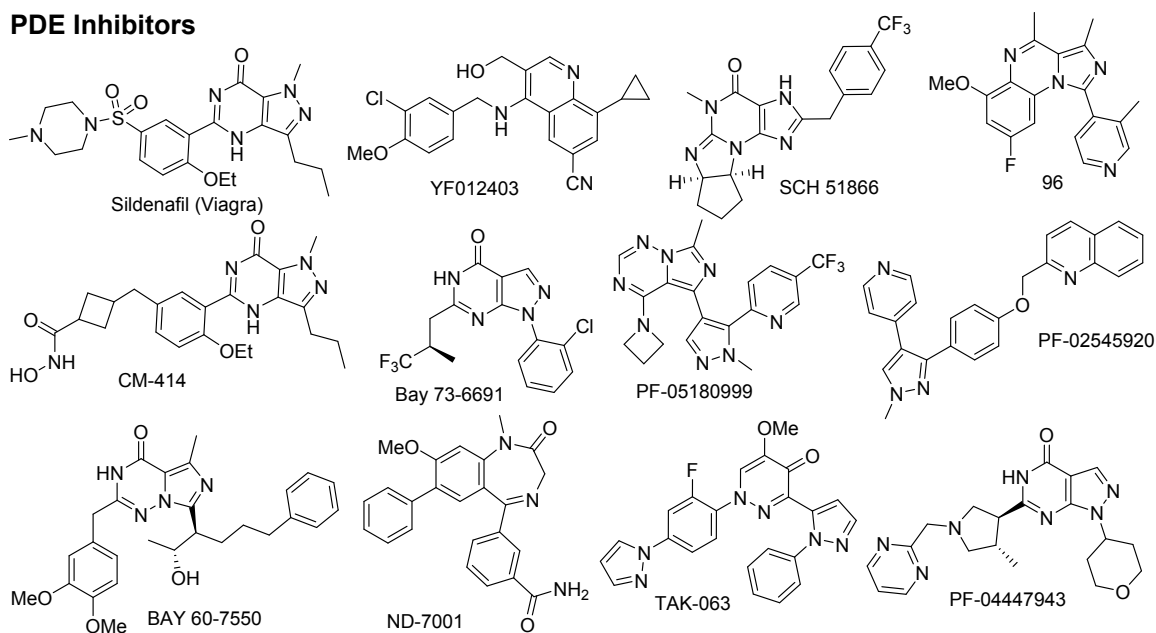

**Scheme 1:** Structures of pharmacological modulators of NO/cGMP signaling.
